# Supplementary material for: An effect on the side chain position of D–π–A-type conjugated polymers with sp2-hybridized orbitals for organic photovoltaics
Source: Royal Society of Chemistry journal article supplement (doi:10.1039/c3py00195d), 2013-01-01
Supplement: c3py00195d.pdf [file c3py00195d.pdf]

## ***Electronic Supplementary Information***

### **An Effect on Side Chain Position of D- $\pi$ -A-type Conjugated Polymers with sp<sup>2</sup>-Hybridized Orbital for Organic Photovoltaics**

**Kwan Wook Song, Ho Jun Song, Tae Ho Lee, Soo Won Heo and \*Doo Kyung Moon**

*Department of Materials Chemistry and Engineering, Konkuk University, 1 Hwayang-dong,  
Gwangjin-gu, Seoul 143-701, Korea*

#### **Contents**

- 1. <sup>1</sup>H-NMR Spectrum of polymers**
- 2. Cyclic voltammograms of thin films of polymers**
- 3. A comparison of polymer energy level used by Gaussian Calculations**
- 4. Devices Fabrication and Characterization of polymers**

### 1. $^1\text{H-NMR}$ Spectrum of polymers

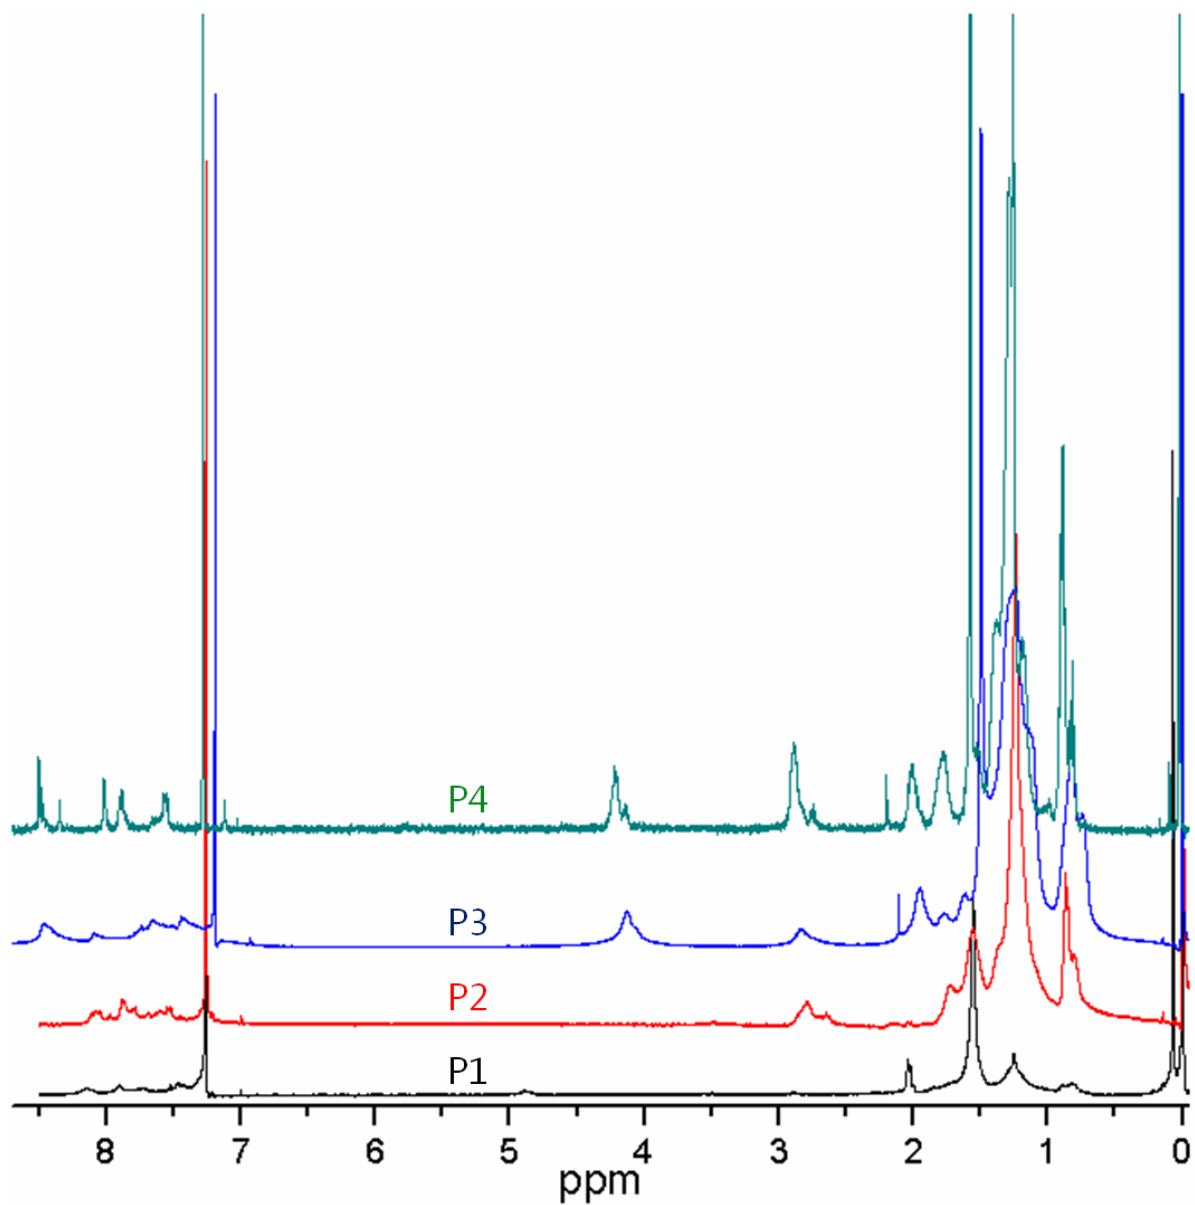

Figure S1.  $^1\text{H-NMR}$  Spectrum of polymers

## 2. Cyclic voltammograms of thin films of polymers

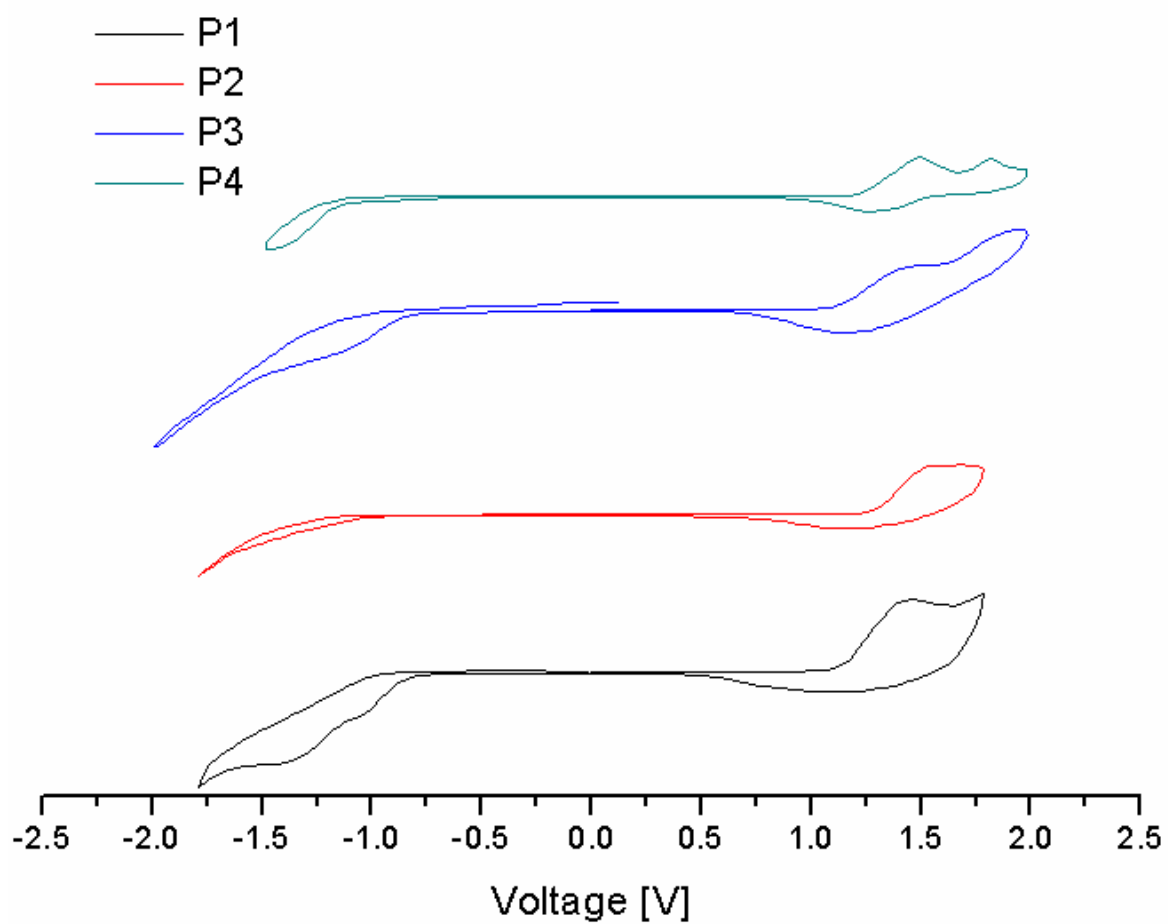

Figure S 2. Cyclic voltammograms of thin films of polymers

### 3. A comparison of polymer energy level used by Gaussian Calculations

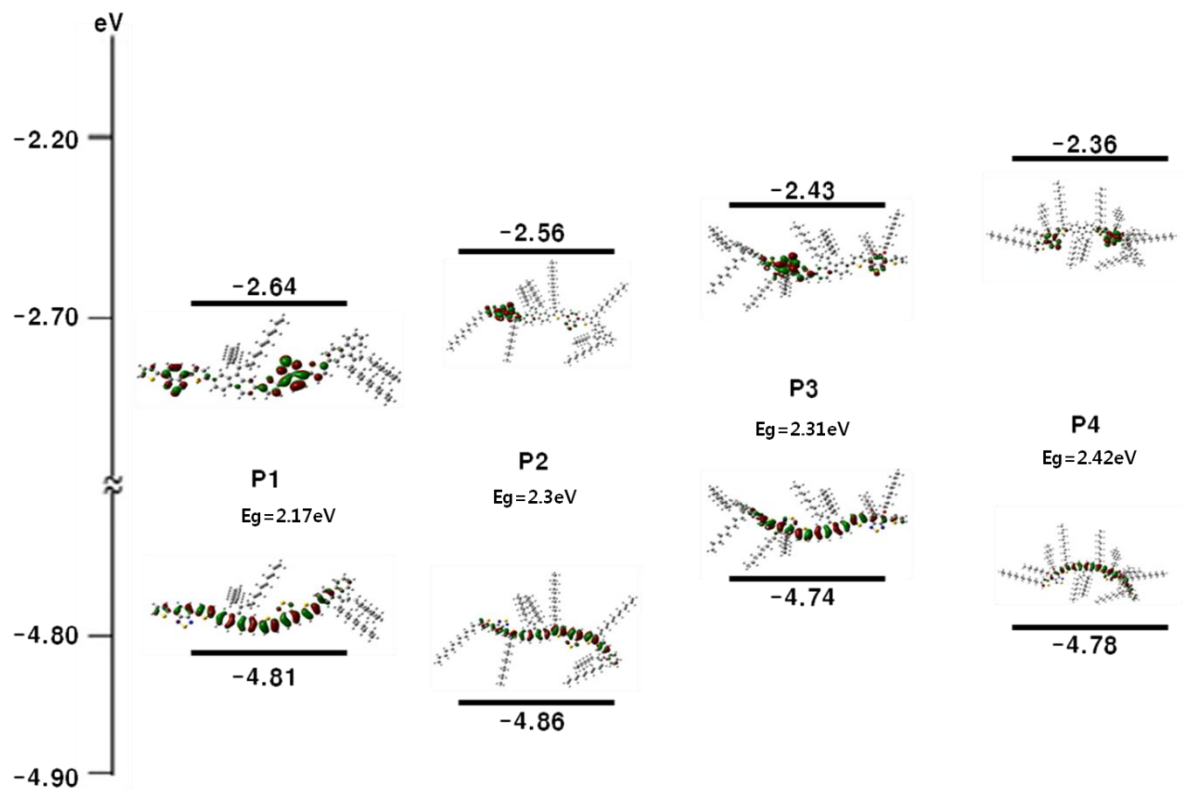

**Figure S3.** A comparison of polymer energy level used by **Gaussian Calculations**

#### 4. Devices Fabrication and Characterization of polymers

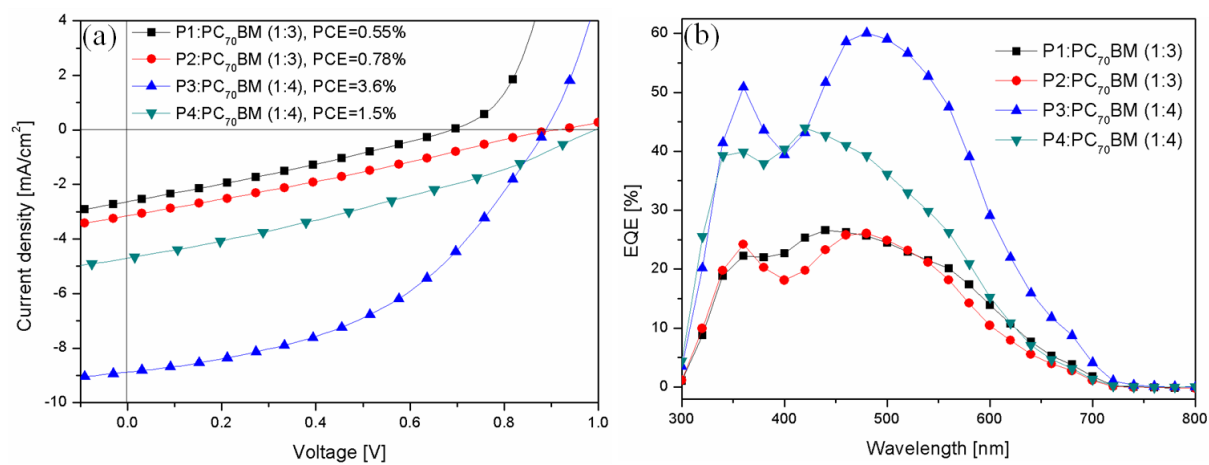

Figure S 4. Devices Fabrication and Characterization of polymers
